# Supplementary material
Source: PubMed Central journal article supplement (PMC2576597)
Supplement: supp_46_11_3599__1.pdf [file supp_46_11_3599__1.pdf]

**Table.** Probes and primers used for reverse-capture checkerboard hybridization analysis

| Taxa                                          | Sequence (5' – 3')                             | Base position ( <i>E. coli</i> ) |
|-----------------------------------------------|------------------------------------------------|----------------------------------|
| <i>Actinomyces gerencseriae</i> <sup>a</sup>  | TTTTTTTTTTTTTTTTTTACCCAGAAAGCCCGTT             | 65                               |
| <i>Actinomyces israelii</i> <sup>a</sup>      | TTTTTTTTTTTTTTTTTTGGCACAGCCAGAACAC             | 179                              |
| <i>Actinomyces odontolyticus</i> <sup>a</sup> | TTTTTTTTTTTTTTTTTTTTCAGTGCCGCGCTGC             | 998                              |
| <i>Aggregatibacter aphrophilus</i>            | TTTTTTTTTTTTTTTTTTTCCACCAAGCTCAAAGCA           | 837                              |
| <i>Anaeroglobus geminatus</i>                 | TTTTTTTTTTTTTTTTTTTAGAAGAACCAGGTATCTCTACC      | 1009                             |
| <i>Atopobium rimae</i>                        | TTTTTTTTTTTTTTTTTTTACGGAAGACGTATTCTCC          | 837                              |
| <i>Bacteroidetes</i> clone X083               | TTTTTTTTTTTTTTTTTTTACTTGAGTGGAGGGTAGG          | 132                              |
| <i>Bifidobacterium</i> (All) <sup>a</sup>     | TTTTTTTTTTTTTTTTTTTGGACGCGACCCCAT              | 228                              |
| <i>Bulleidia extracta</i>                     | TTTTTTTTTTTTTTTTTTTCCCACAATTTGACCATGAA         | 598                              |
| <i>Campylobacter gracilis</i>                 | TTTTTTTTTTTTTTTTTTTGGTAGCGAATTTCCGATTTC        | 1439                             |
| <i>Campylobacter rectus</i>                   | TTTTTTTTTTTTTTTTTTTGTCTATGCTTAGAAGGATATAGA     | 160                              |
| <i>Capnocytophaga gingivalis</i>              | TTTTTTTTTTTTTTTTTTTAAAGGGCTTCTCCCTC            | 64                               |
| <i>Catonella morbid</i>                       | TTTTTTTTTTTTTTTTTTTATCAAATCATGCGATTTAACCGA     | 184                              |
| <i>Corynebacterium matruchotii</i>            | TTTTTTTTTTTTTTTTTTTAGGTACGTATCTCTACAACC        | 1006                             |
| <i>Cryptobacterium curtum</i>                 | TTTTTTTTTTTTTTTTTTTTCGGCTGCGACATCTC            | 1013                             |
| <i>Desulfovibrio</i> clone BB161              | TTTTTTTTTTTTTTTTTTTCCATAAACTTCATTCAGAGCG       | 182                              |
| <i>Dialister invisus</i>                      | TTTTTTTTTTTTTTTTTTTGTCTTTCCGCTTTTTCG           | 67                               |
| <i>Dialister pneumosintes</i>                 | TTTTTTTTTTTTTTTTTTTACCATGCGATGCTTAGAA          | 181                              |
| <i>Dialister</i> clone BS016                  | TTTTTTTTTTTTTTTTTTTCTCAGTTTCCATCCCATAAC        | 627                              |
| <i>Dialister</i> clone 9N-7                   | TTTTTTTTTTTTTTTTTTTGTCTCTCTCTCTCTCTC           | 67                               |
| <i>Dialister</i> clone 55A-29                 | TTTTTTTTTTTTTTTTTTTGTCTGTCTTTTTCCGACG          | 460                              |
| <i>Eikenella corrodens</i>                    | TTTTTTTTTTTTTTTTTTTCTTAGGACGTATGCGGTATTAG      | 169                              |
| <i>Enterococcus faecalis</i>                  | TTTTTTTTTTTTTTTTTTTGTACAGGGGACGTTCCAG          | 470                              |
| <i>Eubacterium brachy</i>                     | TTTTTTTTTTTTTTTTTTTATAGGGCGAACAAATGGT          | 622                              |
| <i>Eubacterium</i> clone CK051                | TTTTTTTTTTTTTTTTTTTCCGAACCGAGATACAGT           | 1289                             |
| <i>Eubacterium infirmum</i>                   | TTTTTTTTTTTTTTTTTTTGTATCTCTTGTTCATCATGG        | 177                              |
| <i>Eubacterium saphenum</i>                   | TTTTTTTTTTTTTTTTTTTAAAGGGTACGTCAGAGG           | 999                              |
| <i>Eubacterium sulci</i>                      | TTTTTTTTTTTTTTTTTTTGTGTATCTCTTGCCTTATGG        | 177                              |
| <i>Filifactor alocis</i>                      | TTTTTTTTTTTTTTTTTTTAAAAGGCTGTCAATGGTATGT       | 994                              |
| <i>Fusobacterium nucleatum</i>                | TTTTTTTTTTTTTTTTTTTCATAATTCTAGGATGCCCTATAATCAT | 184                              |
| <i>Gemella morbillorum</i>                    | TTTTTTTTTTTTTTTTTTTATGAGGTTGGCTGACTCT          | 1269                             |
| <i>Granulicatella adiacens</i>                | TTTTTTTTTTTTTTTTTTTCTTCAAGCCATGCGGC            | 184                              |
| <i>Johnsonella ignava</i>                     | TTTTTTTTTTTTTTTTTTTCCACCGGTATCCCTTTTTTG        | 206                              |
| <i>Lachnospiraceae</i> clone MCE7_60          | TTTTTTTTTTTTTTTTTTTGGGGAAAGCACATTACATG         | 1010                             |
| <i>Lachnospiraceae</i> clone 55A-34           | TTTTTTTTTTTTTTTTTTTCTTCTCCTGGGCACT             | 70                               |
| <i>Lactobacillus</i> (All) <sup>b</sup>       | TTTTTTTTTTTTTTTTTTTCGGTATTAGCAYCTGTTTCCA       | 177                              |
| <i>Leptotrichia</i> (All)                     | TTTTTTTTTTTTTTTTTTTACGGACACTCTTCATGC           | 840                              |
| <i>Megasphaera</i> clone CS025                | TTTTTTTTTTTTTTTTTTTTCAGCCAACCAGTTTCTC          | 636                              |
| <i>Mogibacterium pumilum</i>                  | TTTTTTTTTTTTTTTTTTTCCCGAAGTTCATGCACT           | 72                               |
| <i>Olsenella</i> genomospecies C1             | TTTTTTTTTTTTTTTTTTTGCACGGAAAGTAAAGCCTC         | 835                              |
| <i>Olsenella uli</i>                          | TTTTTTTTTTTTTTTTTTTGTATACCCCGCAACGA            | 249                              |
| <i>Parvimonas micra</i>                       | TTTTTTTTTTTTTTTTTTTCCATTCCCGAAAGAATTTTC        | 80                               |
| <i>Peptostreptococcus anaerobius</i>          | TTTTTTTTTTTTTTTTTTTGTTCGGAGGCTAACTACG          | 624                              |
| <i>Peptostreptococcus stomatis</i>            | TTTTTTTTTTTTTTTTTTTAGTCTTAGAATACTCAATACTGAGC   | 69                               |
| <i>Porphyromonas endodontalis</i>             | TTTTTTTTTTTTTTTTTTTCAAACCTCTCATCTGCCATCATCTAAA | 997                              |
| <i>Porphyromonas gingivalis</i>               | TTTTTTTTTTTTTTTTTTTACTGTTAGCAACTACCGATGT       | 1115                             |
| <i>Porphyromonas</i> clone BB134              | TTTTTTTTTTTTTTTTTTTTCCCATGCGGAAAAAG            | 187                              |
| <i>Prevotella baroniae</i>                    | TTTTTTTTTTTTTTTTTTTGTATACCCGAGTCGCG            | 138                              |
| <i>Prevotella intermedia</i>                  | TTTTTTTTTTTTTTTTTTTCAACATCTCTGTATCCTGC         | 1003                             |
| <i>Prevotella loeschei</i>                    | TTTTTTTTTTTTTTTTTTTATCCTTCAACGAYAAACCT         | 211                              |
| <i>Prevotella multisaccharivorax</i>          | TTTTTTTTTTTTTTTTTTTCTCAGATGGCCTCATAGG          | 186                              |
| <i>Prevotella nigrescens</i>                  | TTTTTTTTTTTTTTTTTTTACCGGAAAACCTTTGTTTCAT       | 202                              |
| <i>Prevotella oralis</i>                      | TTTTTTTTTTTTTTTTTTTGGCCATCAAAGTTGAAAAACAAC     | 79                               |
| <i>Prevotella tannerae</i>                    | TTTTTTTTTTTTTTTTTTTCCGATGGCAAACGTAGAA          | 1117                             |
| <i>Propionibacterium propionicum</i>          | TTTTTTTTTTTTTTTTTTTCTGTAAACCGACCAAAAAGG        | 1025                             |
| <i>Pseudoramibacter alactolyticus</i>         | TTTTTTTTTTTTTTTTTTTCCGGCACTGACTTATTCG          | 837                              |
| <i>Selenomonas sputigena</i>                  | TTTTTTTTTTTTTTTTTTTGAAGGGAGGAAGCTATCTCT        | 1012                             |
| <i>Slackia exigua</i>                         | TTTTTTTTTTTTTTTTTTTGTTCGCCACTCTATGC            | 96                               |
| <i>Solobacterium moorei</i>                   | TTTTTTTTTTTTTTTTTTTATTTAACCACTTACTTAACAGGC     | 588                              |
| SR1 oral clone X112                           | TTTTTTTTTTTTTTTTTTTAGATTACGACACTCCTGC          | 847                              |
| <i>Streptococcus</i> (All) <sup>a</sup>       | TTTTTTTTTTTTTTTTTTTAGCCGTCCTTTCTGGT            | 491                              |
| <i>Synergistes</i> clone BA121                | TTTTTTTTTTTTTTTTTTTGTGCTCAGCTTTATCTGGTA        | 1129                             |
| <i>Synergistes</i> clone BH007                | TTTTTTTTTTTTTTTTTTTATACCACTCCGCGTCTC           | 82                               |
| <i>Synergistes</i> clones BH017/ D084         | TTTTTTTTTTTTTTTTTTTCGTCAATGTTTCCATCTCCTAC      | 1002                             |
| <i>Synergistes</i> clone W028                 | TTTTTTTTTTTTTTTTTTTGTACGTCGTCACCGTTTC          | 1010                             |
| <i>Synergistes</i> clone W090                 | TTTTTTTTTTTTTTTTTTTGAAAGTACGTCGTCGCC           | 1015                             |
| <i>Tannerella forsythia</i>                   | TTTTTTTTTTTTTTTTTTTGACAGGTATTGCTACCATCG        | 73                               |
| <i>Tannerella</i> clone BU063                 | TTTTTTTTTTTTTTTTTTTCAAATAACACCATGCGGC          | 192                              |
| <i>Treponema amylovorum</i>                   | TTTTTTTTTTTTTTTTTTTACGCGCTTTATTCGGTGA          | 187                              |
| <i>Treponema denticola</i>                    | TTTTTTTTTTTTTTTTTTTCTGAAGCGGAGCCGTAG           | 207                              |
| <i>Treponema lecithinolyticum</i>             | TTTTTTTTTTTTTTTTTTTTCATCCGTATCTCTACGAACCTAAG   | 1001                             |
| <i>Treponema maltophilum</i>                  | TTTTTTTTTTTTTTTTTTTACTCTCAAAAAGCGGGAAG         | 83                               |
| <i>Treponema medium</i>                       | TTTTTTTTTTTTTTTTTTTCACTTACGGTGTGGCTT           | 1256                             |
| <i>Treponema parvum</i>                       | TTTTTTTTTTTTTTTTTTTACCTTTCTGTCCACCGCTTA        | 473                              |
| <i>Treponema pectinovorum</i>                 | TTTTTTTTTTTTTTTTTTTCTCAACTTATATGACCTTATCC      | 177                              |
| <i>Treponema putidum</i>                      | TTTTTTTTTTTTTTTTTTTACGGCTTTATCCGTATAAGC        | 183                              |
| <i>Treponema socranskii</i>                   | TTTTTTTTTTTTTTTTTTTCTACCTTCCGTATACAGTGAT       | 182                              |
| <i>Treponema vincentii</i>                    | TTTTTTTTTTTTTTTTTTTACTTCTTATGAACCAATTGAGACT    | 181                              |
| <i>Treponema</i> l:G:T21 /l:W:T040            | TTTTTTTTTTTTTTTTTTTCAACATCTCTTGTGACATG         | 181                              |
| <i>Treponema</i> 6:G:G47                      | TTTTTTTTTTTTTTTTTTTAGTATCGCTCTTGTATGTCGA       | 991                              |
| <i>Treponema</i> 6:H:D15A-4                   | TTTTTTTTTTTTTTTTTTTCTTGCAGAAATATGGTGAC         | 183                              |
| <i>Treponema</i> ll:10:D12                    | TTTTTTTTTTTTTTTTTTTCTCACAGGCATTCCCT            | 463                              |
| <i>Veillonella</i> (All) <sup>a</sup>         | TTTTTTTTTTTTTTTTTTTAAATCCCCTCCTTCAGTGA         | 218                              |
| Universal 1089 <sup>a</sup>                   | TTTTTTTTTTTTTTTTTTTCTCGTTGCGGGACTTAAC          | 1089                             |
| Universal 341 <sup>a</sup>                    | TTTTTTTTTTTTTTTTTTTCTGCTGCCTCCCGTAGG           | 341                              |
| Universal forward PCR primer 8f               | Digoxigenin-AGA GTT TGA TYM TGG C              | 8                                |
| Universal forward PCR primer 515f             | Digoxigenin-GTG CCA GCA GCC GCG GTM A          | 515                              |
| Universal reverse PCR primer 519r             | GTR TTA CCG CGG CTG CTG                        | 519                              |
| Universal reverse PCR primer 1492r            | GYT ACC TTG TTA CGA CTT                        | 1492                             |

<sup>a</sup> probes described by Becker *et al.*(3); <sup>b</sup> probes described by Byun *et al.* (5).
