# Supplementary material
Source: PubMed Central journal article supplement (PMC2576597)

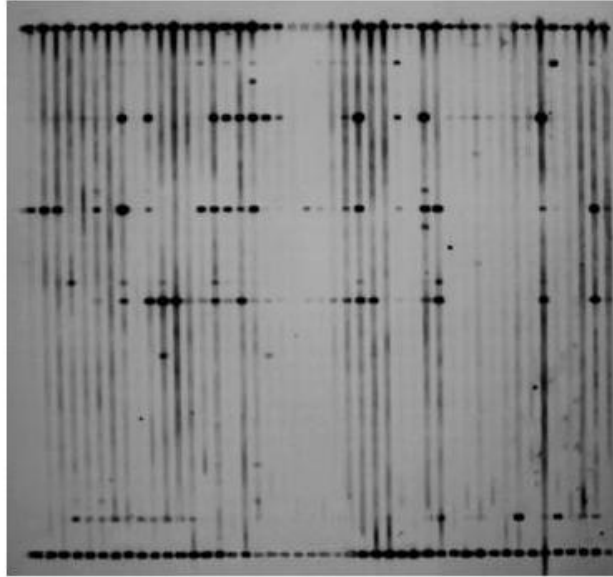

**Figure S1.** Representative checkerboard membrane.

Supplement: supp_46_11_3599__2.pdf [file supp_46_11_3599__2.pdf]
